# Supplementary material for: Near ultraviolet excitable cyan-green phosphors of Ba6La2Al3ScO15:Ce3+ and Ba6La2Al3ScO15:Ce3+,Tb3+: investigations on the crystal structure, site assignment of Ce3+ and Tb3+ ions, and an energy transfer process from Ce3+ to Tb3+
Source: Royal Society of Chemistry journal article supplement (doi:10.1039/d3dt00383c), 2023-01-01
Supplement: d3dt00383c1.pdf [file d3dt00383c1.pdf]

## Electronic Supplementary Information (ESI) for

### **Near Ultraviolet Excitable Cyan-Green Phosphors of $\text{Ba}_6\text{La}_2\text{Al}_3\text{ScO}_{15}:\text{Ce}^{3+}$ and $\text{Ba}_6\text{La}_2\text{Al}_3\text{ScO}_{15}:\text{Ce}^{3+},\text{Tb}^{3+}$ : Investigations on Crystal Structure, Site Assignment of $\text{Ce}^{3+}$ and $\text{Tb}^{3+}$ ions, and Energy Transfer Process from $\text{Ce}^{3+}$ to $\text{Tb}^{3+}$**

Masato Iwaki<sup>†,\*</sup>, Mizuho Onodera<sup>†</sup>, Kazuyoshi Uematsu<sup>§</sup>, Kenji Toda<sup>†,\*</sup> and Mineo Sato<sup>§</sup>

<sup>†</sup>Graduate School of Science and Technology, Niigata University, 8050 Ikarashi 2-nocho, Niigata 950-2181, Japan

<sup>§</sup>Department of Chemistry and Chemical Engineering, Niigata University, 8050 Ikarashi 2-nocho, Niigata 950-2181, Japan.

\*Corresponding author

\*Masato Iwaki

Tel/Fax +81-25-262-6772

E-mail: f20k003j@mail.cc.niigata-u.ac.jp

\* Kenji Toda

Tel/Fax +81-25-262-6771

E-mail: ktoda@eng.niigata-u.ac.jp

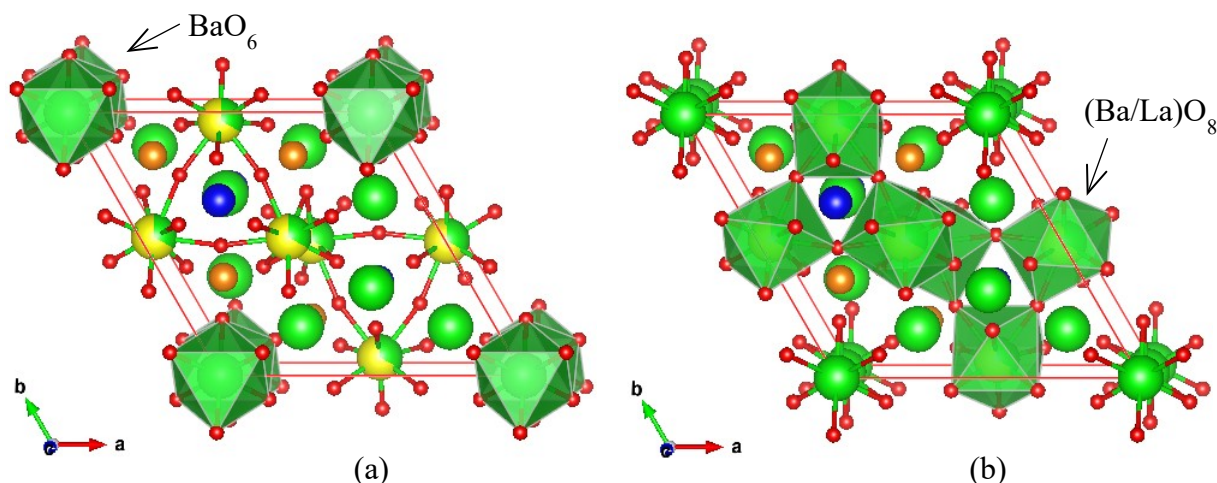

Figure S1. (a) Linkage of  $\text{BaO}_6$  octahedra along [001] direction and (b) network of  $(\text{Ba/La})\text{O}_8$  polyhedra.

Table S1a. Bond distances( $\text{\AA}$ ) and polyhedral indices of  $\text{BaO}_6$  polyhedron in BLASO.

|                               |                        |
|-------------------------------|------------------------|
| Ba1 - O4                      | 2.586(12)              |
| Ba1 - O4                      | 2.892(13)              |
| Ba1 - O4                      | 2.892(13)              |
| Ba1 - O4                      | 2.586(12)              |
| Ba1 - O4                      | 2.586(12)              |
| Ba1 - O4                      | 2.892(13)              |
| Average bond length           | 2.7394 $\text{\AA}$    |
| Polyhedral volume             | 26.5229 $\text{\AA}^3$ |
| Distortion index(bond length) | 0.05586                |
| Effective coordination number | 5.2062                 |

Table S1b. Bond distances( $\text{\AA}$ ) and polyhedral indices of  $(\text{Ba/La})\text{O}_8$  polyhedron in BLASO.

|                               |                        |
|-------------------------------|------------------------|
| Ba4/La4 - O2                  | 2.636(7)               |
| Ba4/La4 - O1                  | 2.691(10)              |
| Ba4/La4 - O3                  | 2.73(2)                |
| Ba4/La4 - O1                  | 2.499(10)              |
| Ba4/La4 - O2                  | 2.636(7)               |
| Ba4/La4 - O1                  | 2.691(10)              |
| Ba4/La4 - O3                  | 2.381(14)              |
| Ba4/La4 - O1                  | 2.499(10)              |
| Average bond length           | 2.5948 $\text{\AA}$    |
| Polyhedral volume             | 30.4526 $\text{\AA}^3$ |
| Distortion index(bond length) | 0.03912                |
| Effective coordination number | 7.1312                 |

Table S1c. Bond distances( $\text{\AA}$ ) and polyhedral indices of  $\text{BaO}_{10}$  polyhedron in BLASO.

|                               |                        |
|-------------------------------|------------------------|
| Ba2 - O1                      | 2.856(12)              |
| Ba2 - O4                      | 3.099(7)               |
| Ba2 - O3                      | 2.903(6)               |
| Ba2 - O1                      | 3.144(9)               |
| Ba2 - O4                      | 3.184(14)              |
| Ba2 - O2                      | 2.666(19)              |
| Ba2 - O1                      | 3.144(9)               |
| Ba2 - O4                      | 3.099(7)               |
| Ba2 - O3                      | 2.903(6)               |
| Ba2 - O1                      | 2.856(12)              |
| Average bond length           | 2.9853 $\text{\AA}$    |
| Polyhedral volume             | 56.5525 $\text{\AA}^3$ |
| Distortion index(bond length) | 0.04974                |
| Effective coordination number | 8.1618                 |

Table S1d. Bond distances( $\text{\AA}$ ) and polyhedral indices of  $\text{BaO}_{12}$  polyhedron in BLASO.

|                               |                        |
|-------------------------------|------------------------|
| Ba3 - O1                      | 3.219(13)              |
| Ba3 - O1                      | 3.219(13)              |
| Ba3 - O2                      | 3.271(19)              |
| Ba3 - O3                      | 2.768(19)              |
| Ba3 - O3                      | 2.768(19)              |
| Ba3 - O1                      | 3.219(13)              |
| Ba3 - O2                      | 3.271(19)              |
| Ba3 - O1                      | 3.219(13)              |
| Ba3 - O2                      | 3.271(19)              |
| Ba3 - O1                      | 3.219(13)              |
| Ba3 - O3                      | 2.768(19)              |
| Ba3 - O1                      | 3.219(13)              |
| Average bond length           | 3.1193 $\text{\AA}$    |
| Polyhedral volume             | 69.9772 $\text{\AA}^3$ |
| Distortion index(bond length) | 0.05631                |
| Effective coordination number | 8.3884                 |

Table S1e. Bond distances( $\text{\AA}$ ) and polyhedral indices of  $\text{YO}_8$  polyhedron in YAG.

|                               |                        |
|-------------------------------|------------------------|
| Y1-O1                         | 2.317(4)               |
| Y1-O1                         | 2.317(4)               |
| Y1-O1                         | 2.437(4)               |
| Y1-O1                         | 2.437(4)               |
| Y1-O1                         | 2.437(4)               |
| Y1-O1                         | 2.317(4)               |
| Y1-O1                         | 2.317(4)               |
| Y1-O1                         | 2.437(4)               |
| Average bond length           | 2.3767 $\text{\AA}$    |
| Polyhedral volume             | 22.9811 $\text{\AA}^3$ |
| Distortion index(bond length) | 0.02520                |
| Effective coordination number | 7.8058                 |

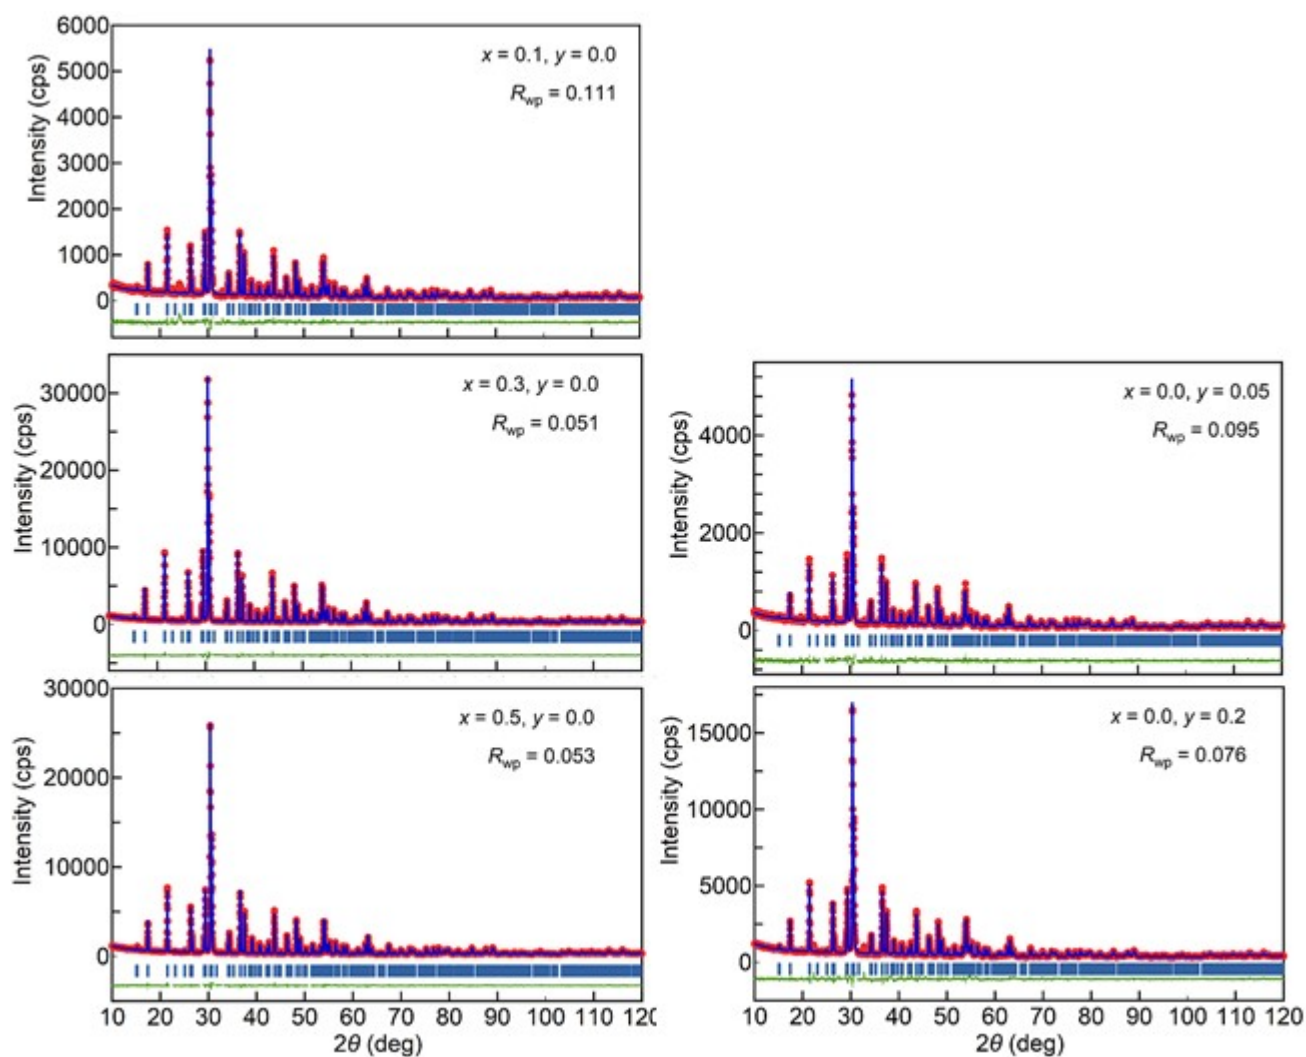

Figure S2. Powder pattern fitting of Rietveld refinement for  $\text{Ba}_6\text{La}_{2(1-x-y)}\text{Ce}_{2x}\text{Tb}_{2y}\text{Al}_3\text{ScO}_{15}$ . The species of Ce and Tb were not included in the refinement because their atomic numbers are close to that of Ba, providing no accurate occupancy factors.

The reliable factors in the Rietveld refinement

$$R_{wp} = \left[ \frac{\sum_i w_i |y_i - f_i(a)|^2}{\sum_i w_i y_i^2} \right]^{1/2} \quad (S1)$$

$$R_p = \frac{\sum_i |y_i - f_i(a)|}{\sum_i y_i} \quad (S2)$$

$$R_B = \frac{\sum_K |I_{obs}(h_K) - I_{cal}(h_K)|}{\sum_K I_{obs}(h_K)} \quad (S3)$$

$$R_F = \frac{\sum_K ||F_{obs}(h_K)| - |F_{cal}(h_K)||}{\sum_K |F_{obs}(h_K)|} \quad (S4)$$

$$R_e = \left[ \frac{m - n}{\sum_i w_i y_i^2} \right]^{1/2} \quad (S5)$$

$$S = \frac{R_{wp}}{R_e} = \left( \frac{\sum_i w_i |y_i - f_i(a)|^2}{m - n} \right)^{1/2} \quad (S6)$$

Where  $m$  is the number of steps in the step-scan measurement,  $I_{obs}(h_K)$  and  $I_{cal}(h_K)$  the observed and calculated integral intensity for Bragg reflection  $K$ , respectively, and  $F_{obs}(h_K)$  and  $F_{cal}(h_K)$  the observed and calculated structure factors, respectively.

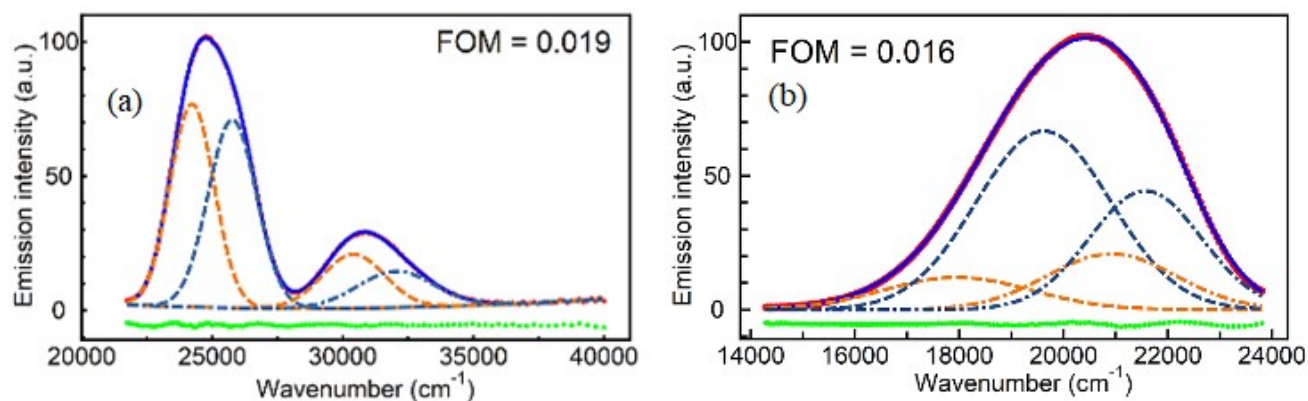

Figure S3. The actual deconvolution in the cm<sup>-1</sup> unit for (a) excitation (b) emission curves. The index of FOM is the Figure-of-merit defined in equation S7.

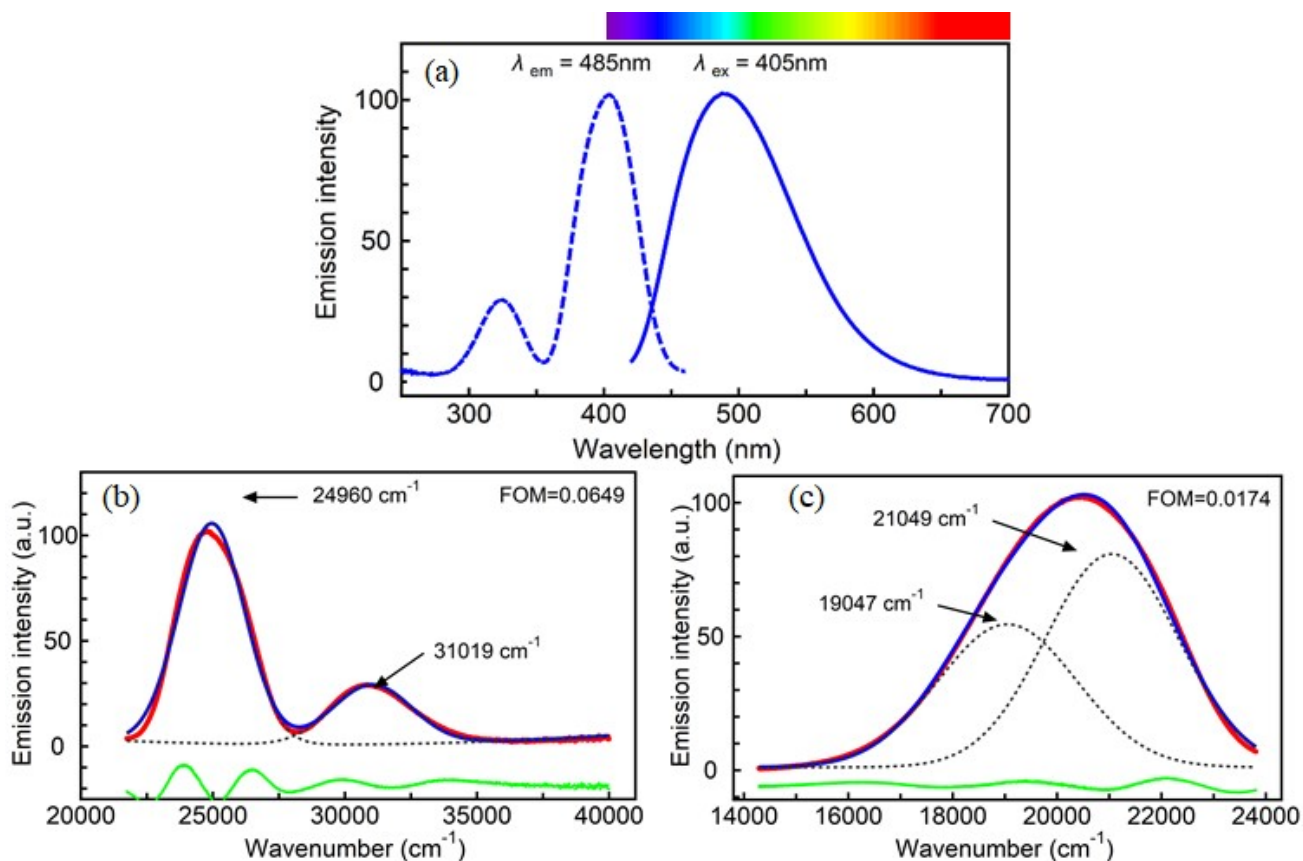

Figure S4. (a) Excitation (dashed line) and emission (solid) spectra of BLASO:Ce<sup>3+</sup> ( $x = 0.015$ ) and Gaussian fitting of (b) excitation and (c) emission of BLASO:Ce<sup>3+</sup> by two components.

#### Index of FOM

It is defined as,

$$FOM = \left[ \frac{\sum_i w_i |y_i^{obs} - y_i^{cal}|^2}{\sum_i w_i y_i^{obs2}} \right]^{1/2} \quad (S7)$$

where  $y_i^{obs}$  is the intensity at  $i$ th data,  $y_i^{cal}$  the intensity at  $i$ th data calculated from the model

Gaussian function and  $w_i$  the weighting factor at  $i$ th data, usually all factors set to 1.

### Calculation of Dorenbos model

The total energy shift from the lowest 5d level edge in a compound  $A$ ,  $E_{total}(Ce^{3+}, A)$ , can be described as equation 1,<sup>1-2</sup>

$$E_{total}(Ce^{3+}, A) = 49,340 \text{ cm}^{-1} - \varepsilon_C - \varepsilon_{cfs} - \Delta S(A) \quad (S8)$$

where the value of  $49340 \text{ cm}^{-1}$  is the energy of free  $Ce^{3+}$ ,  $\varepsilon_C$  means the centroid shift,  $\varepsilon_{cfs}$  is the crystal field splitting,  $\Delta S(A)$  is the Stokes shift estimated from the excitation and emission spectra of compound  $A$ . The centroid shift  $\varepsilon_C$  is estimated from the following equation,<sup>3-4</sup>

$$\varepsilon_C = 1.79 \times 10^{13} \sum_{i=1}^N \frac{\alpha_{sp}^i}{(R_i - 0.6\Delta R)^6} \quad (S9)$$

where  $R_i$  represents the bond distance of the  $Ce^{3+}-O^{2-}$  ions in the host lattice,  $\Delta R$  is the difference in the ionic radii between  $Ce^{3+}$  and the host cation replaced by  $Ce^{3+}$  ( $Ba^{2+}$  and  $La^{3+}$  in this case),  $N$  is the number of anions coordinated with  $Ce^{3+}$ , and  $\alpha_{sp}^i$  the spectroscopic polarizability, which is described as,<sup>4</sup>

$$\alpha_{sp}^i = 0.33 + \frac{4.8}{\chi_{av}^2} \quad (S10)$$

where  $\chi_{av}$  is the weighted average of the cation electronegativity in a host lattice. The strength of the crystal field splitting,  $\varepsilon_{cfs}$ , for a polyhedron can be estimated from the following equation,<sup>4</sup>

$$\varepsilon_{cfs} = \beta_{poly}^Q R_{av}^{-2} \quad (S11)$$

where  $\beta_{poly}^Q$  has a constant dependent on the shape and coordination number, and  $R_{av}$  the average bond distance of the polyhedron, which is defined as,<sup>4</sup>

$$R_{av} = \frac{1}{N} \sum_{i=1}^N (R_i - 0.6\Delta R) \quad (S12)$$

where  $R_i$  is the bond distance between  $Ce^{3+}$  and  $N$  number of coordinating anions, and  $\Delta R$  the difference in ionic radii between the central cation and  $Ce^{3+}$ . The experimentally determined Stokes shift value of  $4100 \text{ cm}^{-1}$ , estimated from the single component fitting in Figure S4, is used in the calculation. The value are comparable to that of  $\gamma\text{-Ca}_2\text{SiO}_4:\text{Ce}^{3+}$  ( $4560 \text{ cm}^{-1}$ )<sup>5</sup> and a little larger than those of  $\text{YAG}:\text{Ce}^{3+}$  ( $\sim 2700 \text{ cm}^{-1}$ )<sup>6</sup>,  $\text{Sr}_3\text{GaO}_4\text{F}:\text{Ce}^{3+}$  ( $2762 \text{ cm}^{-1}$ )<sup>7</sup> and  $\text{Lu}_2\text{CaMg}_2\text{Si}_3\text{O}_{12}:\text{Ce}^{3+}$  ( $2550 \text{ cm}^{-1}$ )<sup>8</sup> phosphors.

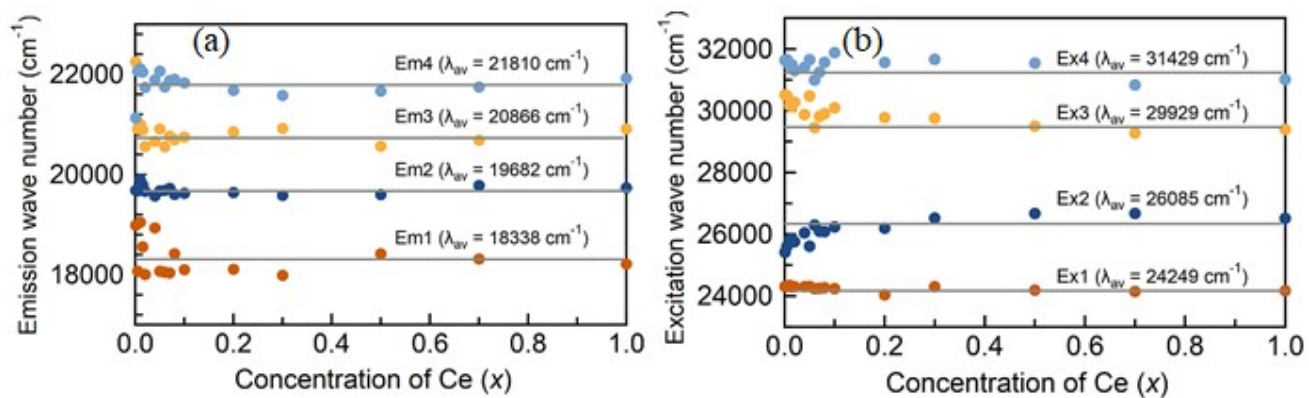

Figure S5. Concentration dependence of (a) emission and (b) excitation wave numbers on Ce in BLASO:Ce<sup>3+</sup>.

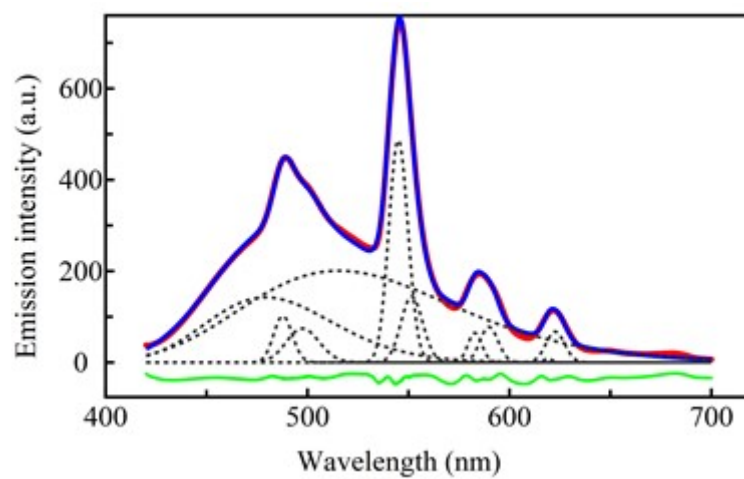

Figure S6. Deconvolution of emission band of BLASO:Ce<sup>3+</sup>(x = 0.015),Tb<sup>3+</sup>(y = 0.05) using Gaussian Function.



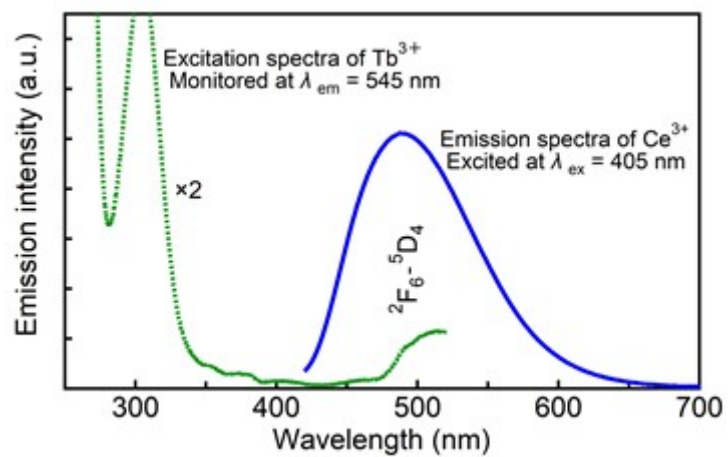

Figure S7. Overlap between excitation of  $Tb^{3+}$  (green dashed line) and emission of  $Ce^{3+}$  (blue solid line) in BLASO.

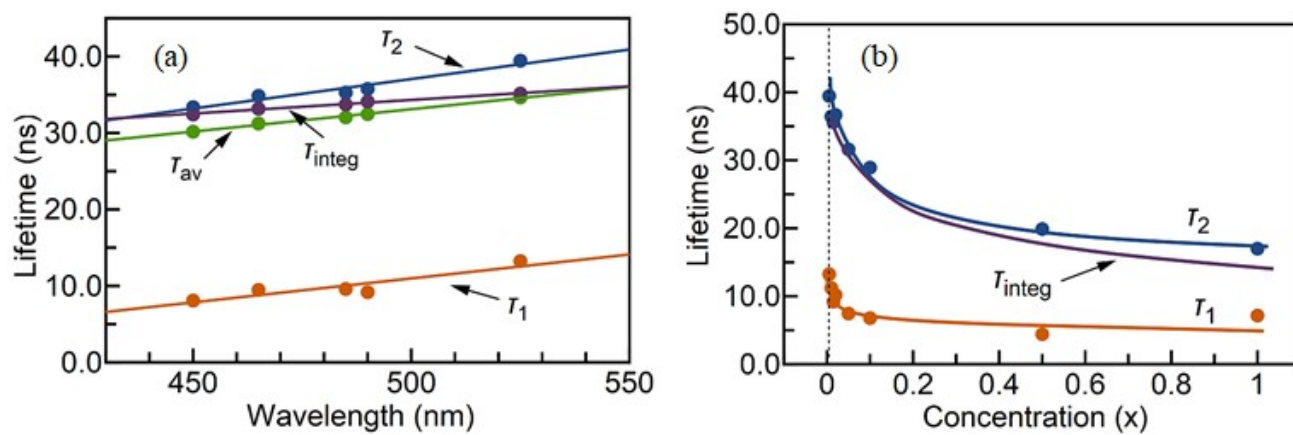

Figure S8. (a) Dependence of  $\text{Ce}^{3+}$  lifetimes on emission wavelength and (b) concentration of  $\text{Ce}^{3+}$ .

Table S2. The values of  $a_1$ ,  $a_2$ , and  $b_1$  in Martin model equation.

| $s$ | $a_1$  | $a_2$  | $b_1$  |
|-----|--------|--------|--------|
| 6   | 10.866 | 15.500 | 8.743  |
| 8   | 17.072 | 35.860 | 13.882 |
| 10  | 24.524 | 67.909 | 20.290 |

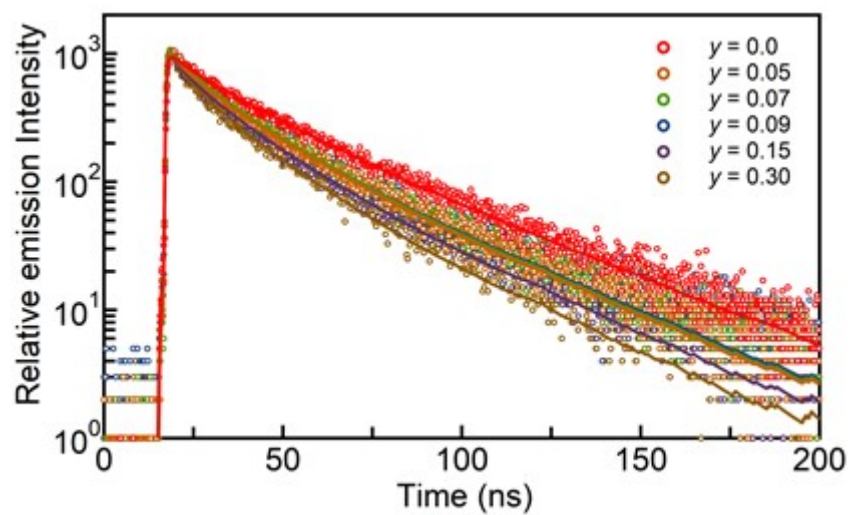

Figure S9. Results of decay curve fitting to Yokota-Tanimoto equation for BLASO:Ce<sup>3+</sup> ( $x = 0.015$ ), Tb<sup>3+</sup> ( $y = 0.05 - 0.30$ ).

## REFERENCES

1. P. Dorenbos, *J. Lumin.* 2000, **91**, 155-176.
2. P. Dorenbos, *J. Lumin.* 2002, **99**, 283-299.
3. P. Dorenbos, *J. Lumin.* 2003, **105**, 117-119.
4. P. Dorenbos, *Journal of Physics: Condensed Matter* 2003, **15**, 4797-4807.
5. A. Kalaji, M. Mikami, A. K. Cheetham, *Chem. Mater.* 2014, **26**, 3966-3975.
6. V. Bachmann, C. Ronda, A. Meijerink, *Chem. Mater.* 2009, **21**, 2077-2084.
7. W. Chen, H. Liang, B. Han, J. Zhong, Q. Su, *J. Phys. Chem. C* 2009, **113**, 17194-17199.
8. A. A. Setlur, W. J. Heward, Y. Gao, A. M. Srivastava, R. G. Chandran, M. V. Shankar, *Chem. Mater.* 2006, **18**, 3314-3322.
